# Supplementary material for: UroPredict: Machine learning model on real-world data for prediction of kidney cancer recurrence (UroCCR-120)
Source: Springer Nature journal article supplement (doi:10.1038/s41698-024-00532-x), 2024-02-23
Supplement: MOESM1 [file 41698_2024_532_MOESM1_ESM.pdf]

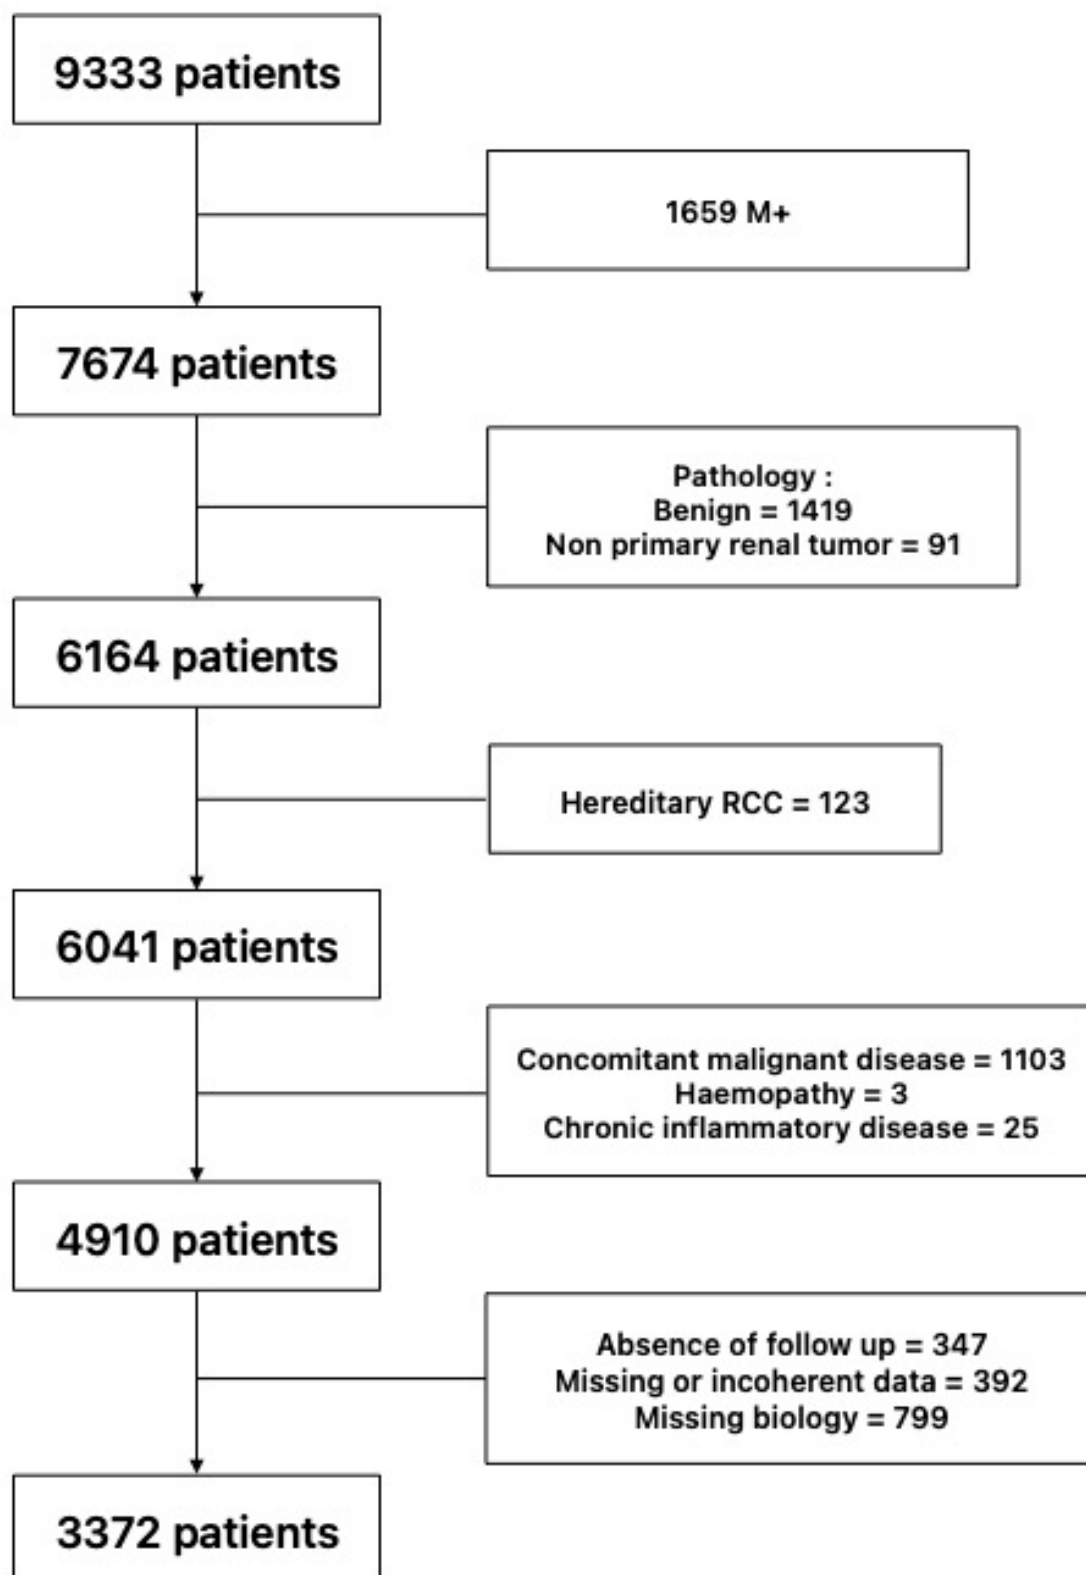

Supplementary figure 1. Flowchart of patient selection
